# Supplementary material for: Determining the presence of naphthenic and vegetable oils in paraffin-based lubricant oils using near infrared spectroscopy and support vector machines
Source: Royal Society of Chemistry journal article supplement (doi:10.1039/c3ay40325d), 2013-01-01
Supplement: c3ay40325d.pdf [file c3ay40325d.pdf]

## Supplementary Data S1 – Calibration sample set compositions

| Sample | Class                          | Sample mixture composition<br>(% v/v)                      |
|--------|--------------------------------|------------------------------------------------------------|
| 1      |                                | PN1                                                        |
| 2      |                                | PN2                                                        |
| 3      |                                | PN3                                                        |
| 4      |                                | PSP                                                        |
| 5      |                                | PN4                                                        |
| 6      |                                | PN5                                                        |
| 7      |                                | 0.25 PBS + 0.75 PN3                                        |
| 8      |                                | 0.50 PN1 + 0.50 PN2                                        |
| 9      |                                | 0.50 PN2 + 0.50 PN3                                        |
| 10     | 1                              | 0.90 PN2 + 0.10 PN1                                        |
| 11     |                                | 0.90 PN2 + 0.10 PN3                                        |
| 12     |                                | 0.90 PN3 + 0.10 PN2                                        |
| 13     |                                | 0.75 PN2 + 0.25 PN3                                        |
| 14     |                                | 0.75 PN3 + 0.25 PN2                                        |
| 15     |                                | 0.34 PBS + 0.66 PN3                                        |
| 16     |                                | 0.15 PBS + 0.85 PN3                                        |
| 17     |                                | 0.90 PN3 + 0.10 PN5                                        |
| 18     |                                | 0.50 PN4 + 0.50 PN5                                        |
| 19     |                                | 0.33 PN1 + 0.33 PN2 + 0.33 PN3                             |
| 20     | 0.15 PN2 + 0.55 PN3 + 0.30 PBS |                                                            |
| 21     | 2                              | 0.90 PN4 + 0.10 NH                                         |
| 22     |                                | 0.90 PN1 + 0.10 NH                                         |
| 23     |                                | 0.90 PN2 + 0.10 NH                                         |
| 24     |                                | 0.90 PN3 + 0.10 NH                                         |
| 25     |                                | 0.90 (0.25 PBS + 0.75 PN3) + 0.10 NH                       |
| 26     |                                | 0.90 PN5 + 0.10 NH                                         |
| 27     |                                | 0.90 PSP + 0.10 NH                                         |
| 28     |                                | 0.85 PN4 + 0.15 NH                                         |
| 29     |                                | 0.85 PN1 + 0.15 NH                                         |
| 30     |                                | 0.85 PN2 + 0.15 NH                                         |
| 31     |                                | 0.85 PN3 + 0.15 NH                                         |
| 32     |                                | 0.85 PN5 + 0.15 NH                                         |
| 33     |                                | 0.85 PSP + 0.15 NH                                         |
| 34     |                                | 0.85 (0.25 PBS + 0.75 PN3) + 0.15 NH                       |
| 35     |                                | 0.85 (0.50 PN1 + 0.50 PN2) + 0.15 NH                       |
| 36     |                                | 0.85 (0.50 PN2 + 0.50 PN3) + 0.15 NH                       |
| 37     |                                | 0.85 (0.75 PN2 + 0.25 PN3) + 0.15 NH                       |
| 38     |                                | 0.85 (0.75 PN3 + 0.25 PN2) + 0.15 NH                       |
| 39     |                                | 0.85 (0.15 PN2 + 0.55 PN3 + 0.30 PBS) + 0.15 NH            |
| 40     |                                | 0.85 (0.33 PN1 + 0.33 PN2 + 0.33 PN3) + 0.15 NH            |
| 41     | 3                              | 0.85 PN4 + 0.10 NH + 0.05 VEG                              |
| 42     |                                | 0.85 PN1 + 0.10 NH + 0.05 VEG                              |
| 43     |                                | 0.85 PN2 + 0.10 NH + 0.05 VEG                              |
| 44     |                                | 0.85 PN3 + 0.10 NH + 0.05 VEG                              |
| 45     |                                | 0.85 (0.25 PBS + 0.75 PN3) + 0.10 NH + 0.05 VEG            |
| 46     |                                | 0.80 PN4 + 0.15 NH + 0.05 VEG                              |
| 47     |                                | 0.80 PN1 + 0.15 NH + 0.05 VEG                              |
| 48     |                                | 0.80 PN2 + 0.15 NH + 0.05 VEG                              |
| 49     |                                | 0.80 PN3 + 0.15 NH + 0.05 VEG                              |
| 50     |                                | 0.80 (0.25 PBS + 0.75 PN3) + 0.15 NH + 0.05 VEG            |
| 51     |                                | 0.80 (0.5 PN1 + 0.50 PN2) + 0.15 NH + 0.05 VEG             |
| 52     |                                | 0.80 (0.5 PN2 + 0.50 PN3) + 0.15 NH + 0.05 VEG             |
| 53     |                                | 0.80 (0.75 PN2 + 0.25 PN3) + 0.15 NH + 0.05 VEG            |
| 54     |                                | 0.80 (0.75 PN3 + 0.25 PN2) + 0.15 NH + 0.05 VEG            |
| 55     |                                | 0.80 (0.15 PN2 + 0.55 PN3 + 0.30 PBS) + 0.15 NH + 0.05 VEG |
| 56     |                                | 0.80 (0.33 PN1 + 0.33 PN2 + 0.33 PN3) + 0.15 NH + 0.05 VEG |
| 57     | 4                              | 0.95 PN4 + 0.05 VEG                                        |
| 58     |                                | 0.95 PN1 + 0.05 VEG                                        |
| 59     |                                | 0.95 PN2 + 0.05 VEG                                        |
| 60     |                                | 0.95 PN3 + 0.05 VEG                                        |
| 61     |                                | 0.95 (0.25 PBS + 0.75 PN3) + 0.05 VEG                      |
| 62     |                                | 0.95 (0.50 PN1 + 0.50 PN2) + 0.05 VEG                      |
| 63     |                                | 0.95 (0.50 PN2 + 0.50 PN3) + 0.05 VEG                      |
| 64     |                                | 0.95 (0.75 PN2 + 0.25 PN3) + 0.05 VEG                      |
| 65     |                                | 0.95 (0.75 PN3 + 0.25 PN2) + 0.05 VEG                      |
| 66     |                                | 0.95 (0.15 PN2 + 0.55 PN3 + 0.30 PBS) + 0.05 VEG           |
| 67     |                                | 0.95 (0.33 PN1 + 0.33 PN2 + 0.33 PN3) + 0.05 VEG           |
